# Supplementary material for: Membrane Destabilization Induced by Lipid Species Increases Activity of Phosphorothioate-Antisense Oligonucleotides
Source: PubMed Central journal article supplement — Mol Ther Nucleic Acids. 2018 Oct 24;13:686–98. doi: 10.1016/j.omtn.2018.10.011 (PMC6276310; doi:10.1016/j.omtn.2018.10.011), 2018-10-24

**OMTN, Volume 13**

**Supplemental Information**

**Membrane Destabilization Induced  
by Lipid Species Increases Activity of  
Phosphorothioate-Antisense Oligonucleotides**

**Shiyu Wang, Nickolas Allen, Xue-hai Liang, and Stanley T. Crooke**

# Membrane Destabilization Induced by Lipid Species Increases Activity of Phosphorothioate Antisense Oligonucleotides

## SUPPLEMENTARY DATA

### Supplemental materials

#### Chemicals and Antibodies

Cholesterol, ceramide, free fatty acids, and fatty acid free bovine serum albumin were from Sigma. N-Rh-PE was from Avanti Polar Lipids. Vybrant™ Alexa Fluor™ 555 Lipid Raft Labeling Kit, Bodipy 493/503, Bodipy-C16, NBD-cholesterol, and NBD-ceramide were from ThermoFisher. Magic Red substrate was from Immunochemistry Technologies.

Antibodies against ERK (4695), p44/42 MAPK (Erk1/2) (4370), and LAMP1 (9091S) were from Cell Signaling Technology. Anti-EEA1 (610456) was from BD Bioscience. LBPA antibody (6C4, Z-PLBPA) was from Echelon. Anti-rabbit (170-6515) and anti-mouse (170-6516) secondary antibodies conjugated to HRP were from Bio-Rad. Antibodies against EGFR (ab52894), EGFR (phospho Y1092, ab205827), Ezrin (ab4069), and AF647 (ab150079) as well as anti-mouse secondary antibodies conjugated to AF488 (ab150113) and AF647 (ab150115) and anti-rabbit secondary antibodies conjugated to AF488 (ab150077) were purchased from Abcam.

#### Primer probe sets for qRT-PCR

Drosha:

Forward: 5'- CAAGCTCTGTCCGTATCGATCA-3'

Reverse: 5'- TGGACGATAATCGGAAAAGTAATCA-3'

Probe: 5'-CTGGATCGTGAACAGTTCAACCCCGAT-3'

Malat1:

Forward: 5'-AAAGCAAGGTCTCCCCACAAG-3'

Reverse: 5'-TGAAGGGTCTGTGCTAGATCAAAA-3'

Probe: 5'-TGCCACATCGCCACCCCGT-3'

#### Oligonucleotides

Oligonucleotides

IONIS ID 446654 targets human *PETN*: 5'-Cy3-C\*T\*G\* C\*T\*A\* G\*C\*C\* T\*C\*T\* G\*G\*A\* T\*T\*T\* G\*A-3'. The underlined nucleotides are 2'-O-MOE modified, the \* indicates phosphorothioate backbone and 5' end is labeled with Cy3.

IONIS ID 851810 targets human *PETN*: 5'-Cy5-C\*T\*G\* C\*T\*A\* G\*C\*C\* T\*C\*T\* G\*G\*A\* T\*T\*T\* G\*A-3'. The underlined nucleotides are 2'-O-MOE modified, the \* indicates phosphorothioate backbone and 5' end is labeled with Cy5.

IONIS ID 395254 targets human *Malat1*: 5'-G\*G\*C\* A\*T\*A\* T\*G\*C\* A\*G\*A\* T\*A\*A\* T\*G\*T\* T\*C-3'. The underlined nucleotides are 2'-O-MOE modified, and the \* indicates phosphorothioate backbone.

IONIS ID 25690 targets *Drosha*: 5'-A\*T\*C\* C\*C\*T\* T\*T\*C\* T\*T\*C\* C\*G\*C\* A\*T\*G\*T\*G-3'. The underlined nucleotides are 2'-O-MOE modified, and the \* indicates phosphorothioate backbone.

## SUPPLEMENTARY FIGURE LEGENDS

**Figure S1. Fatty acids increase PS-ASO activities.** **A) HeLa or B) HEK cells** were treated with indicated concentrations of PS-ASOs targeting *Malat1* for 4 h, followed by replacement with medium without PS-ASOs but containing 200  $\mu$ M palmitic acid. After 20 h, the levels of *Malat1* were determined by qRT-PCR. Percent expression relative to non-PS-ASO treated control is plotted. The error bars represent standard deviations from three independent experiments.  $P < 0.01$  for 100  $\mu$ M versus 0  $\mu$ M (blue);  $P < 0.01$  for 200  $\mu$ M versus 0  $\mu$ M (red). P values were computed by two-way ANOVA using Prism. **C)** A431 cells were treated with PS-ASOs targeting *Drosha* or *Malat1* for 4 h. Medium was replaced with medium without PS-ASO but containing 100  $\mu$ M palmitic acid (16:0), stearic acid (18:0), palmitoleic acid (16:1), oleic acid (16:1), heptadecylic acid (17:0), or nonadecylic acid (19:0), and cells were incubated for another 20 h. The levels of *Drosha* and *Malat1* RNAs were determined by qRT-PCR. Percent expression relative to non-treated control is plotted. The error bars represent standard deviations from three independent experiments. **D)** A431 cells pretreated with 200  $\mu$ M palmitic acid for 16 h were incubated with Cy3-PS-ASO (IONIS ID 446654) for 2 h. Intracellular fluorescence of Cy3-PS-ASO was quantified by flow cytometry. RFU is plotted versus N-Rh-PE concentration;  $p < 0.01$  control versus PA treatment (\*). P values were computed by student T-test; **E)** Intracellular RFU of N-Rh-PE at indicated concentrate was quantified by flow cytometry in A431 cells pretreated with 200  $\mu$ M palmitic acid for 16 h and then N-Rh-PE for 2 h.

**Figure S2. Free fatty acids induce lipid droplets within 4 h.** Immunofluorescent staining for lipid droplets in cells that were treated with 200  $\mu$ M palmitic acid for indicated times. The nuclei were stained with DAPI (blue). Scale bars: 2  $\mu$ m.

**Figure S3. Prolonged treatment of cells with ceramide decreases PS-ASO uptake but increases membrane fusion rates.** **A)** A431 cells were pretreated with 10  $\mu$ M ceramide for 16 h or were not treated (control). Intracellular fluorescence of Cy3-PS-ASO (IONIS ID 446654) was quantified by flow cytometry. RFU is plotted versus Cy3-PS-ASO concentration. **B)** Intracellular fluorescence of N-Rh-PE in A431 cells pretreated with 10  $\mu$ M ceramide for 16 h and then incubated with N-Rh-PE for 2 h. RFU is plotted versus N-Rh-PE concentration.  $p < 0.01$  control versus ceramide treatment (\*). P values were computed by student T-test. **C) HeLa or D) HEK cells were treated with indicated concentrations of PS-ASOs targeting *Malat1* for 4 h, followed by replacement with medium without PS-ASOs but containing 10  $\mu$ M ceramide. After 20 h, the levels of *Malat1* were determined by qRT-PCR. Percent expression relative to non-PS-ASO treated control is plotted. The error bars represent standard deviations from three independent experiments.  $P < 0.01$  for 100  $\mu$ M versus 0  $\mu$ M (blue);  $P < 0.01$  for 10  $\mu$ M versus 0  $\mu$ M (red). P values were computed by two-way ANOVA using Prism.**

**Figure S4. Prolonged treatment of cells with cholesterol decreases PS-ASO uptake but increases membrane fusion rates.** **A)** Intracellular fluorescence of Cy3-PS-ASO (IONIS ID 446654) was quantified by flow cytometry in A431 cells pretreated with 50  $\mu$ M MCD-complexed cholesterol or untreated (control) in the presence of 1  $\mu$ M Sandoz 58-035 for 16 h.  $p < 0.01$  control versus cholesterol treatment (\*). P values were computed by student T-test. **B)**

Intracellular RFU due to N-Rh-PE was quantified by flow cytometry in A431 cells pretreated with 50  $\mu$ M MCD-complexed cholesterol in the presence of 1  $\mu$ M Sandoz 58-035 for 16 h and then incubated with N-Rh-PE for 2 h. RFU is plotted versus N-Rh-PE concentration. **C) HeLa or D) HEK cells were treated with indicated concentrations of PS-ASOs targeting *Malat1* for 4 h, followed by replacement with medium without PS-ASOs but containing 50  $\mu$ M MCD-complexed cholesterol. After 20 h, the levels of *Malat1* were determined by qRT-PCR. Percent expression relative to non-PS-ASO treated control is plotted. The error bars represent standard deviations from three independent experiments.  $P < 0.01$  for 100  $\mu$ M versus 0  $\mu$ M (blue);  $P < 0.01$  for 10  $\mu$ M versus 0  $\mu$ M (red).  $P$  values were computed by two-way ANOVA using Prism.**

**Figure S5. Lipids incorporate into cells within 4 h and do not significantly change lipid raft staining patterns. A)** Representative immunofluorescent images of indicated cells incubated with 50  $\mu$ M BODIPY-C16, 50  $\mu$ M NBD-cholesterol, or 5  $\mu$ M NBD-ceramide. The nuclei were stained with DAPI (blue). Scale bars, 2  $\mu$ m. **B)** Representative immunofluorescent images of A431 cells treated with 200  $\mu$ M palmitic acid (PA), 10  $\mu$ M ceramide (Ceramide) or 50  $\mu$ M MCD-complexed cholesterol (Cholesterol), for 16 h and stained for lipid rafts. The nuclei were stained with DAPI (blue). Scale bars, 2  $\mu$ m.

Fig. S1.

**A**

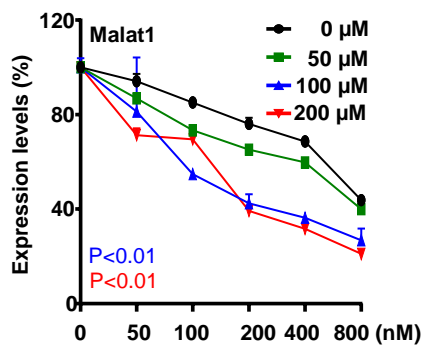

**B**

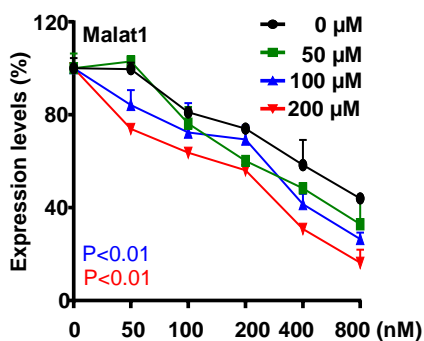

**C**

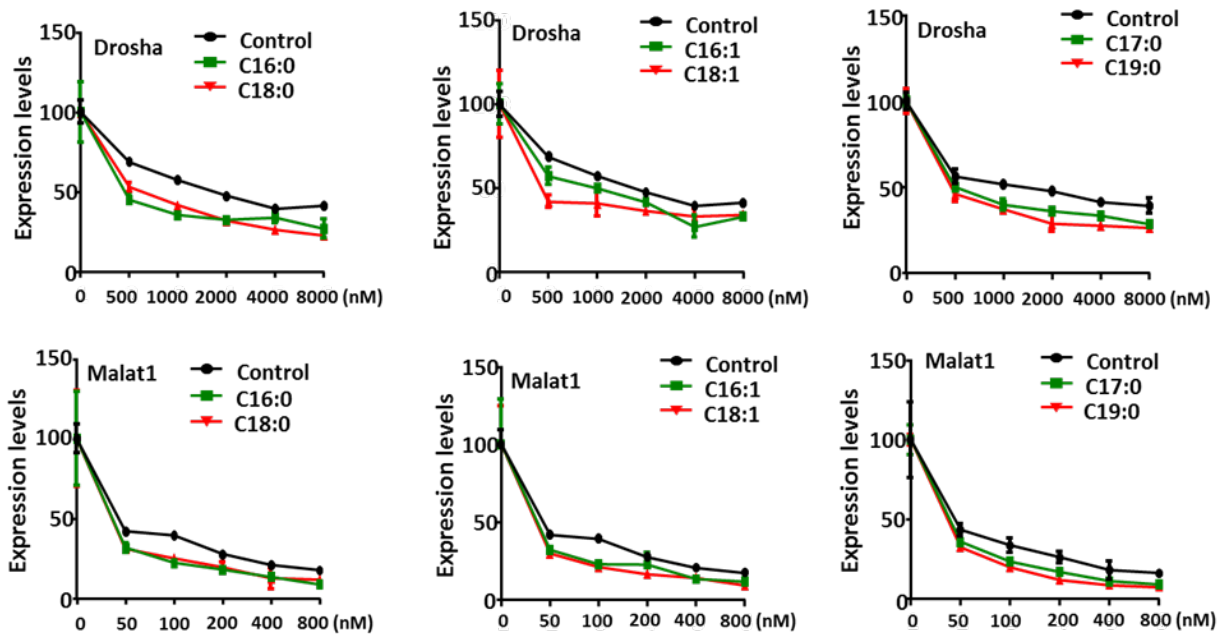

**D**

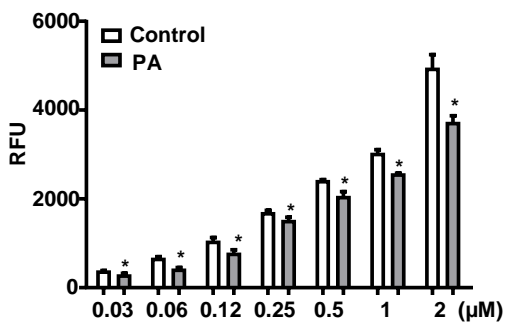

**E**

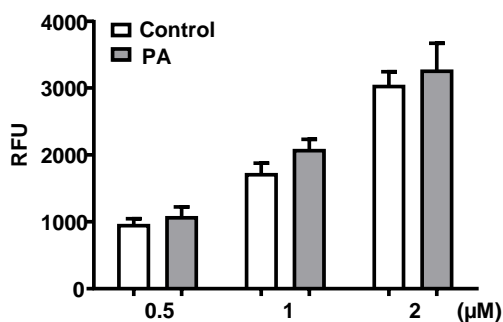

Fig. S2.

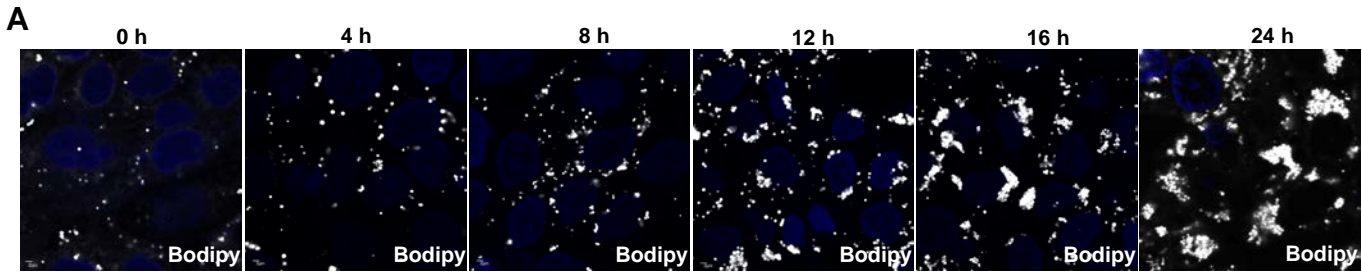

Fig. S3.

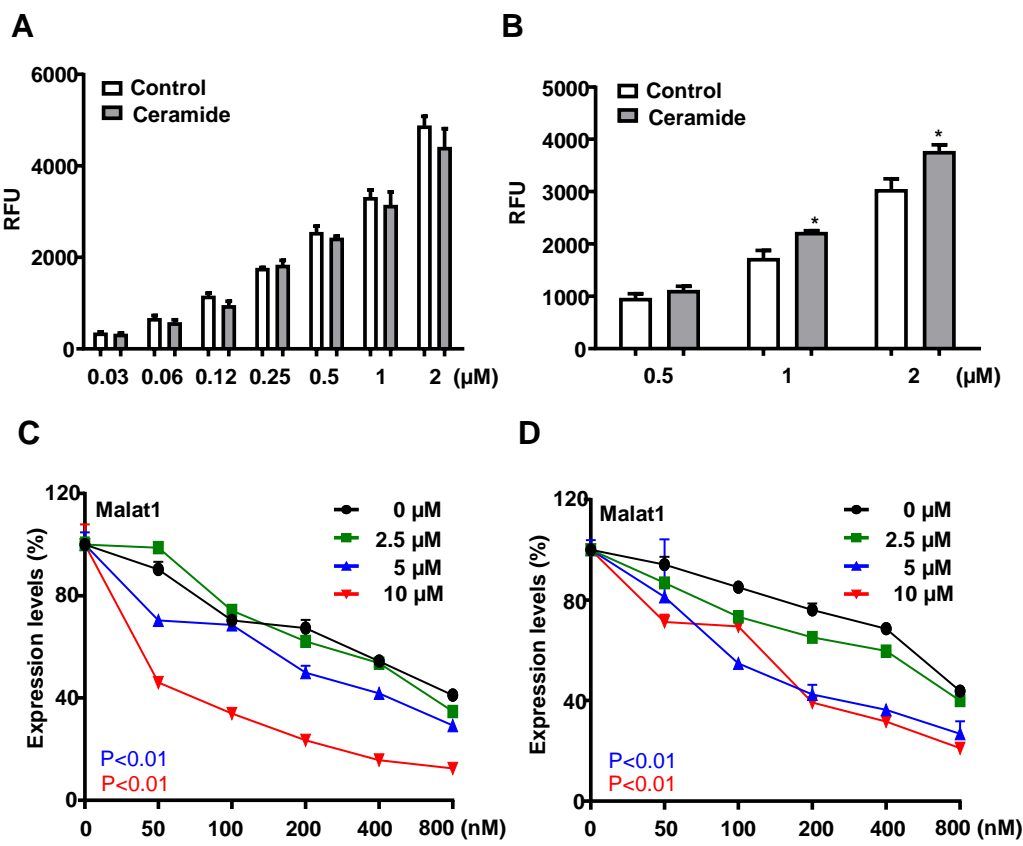



Fig. S4.

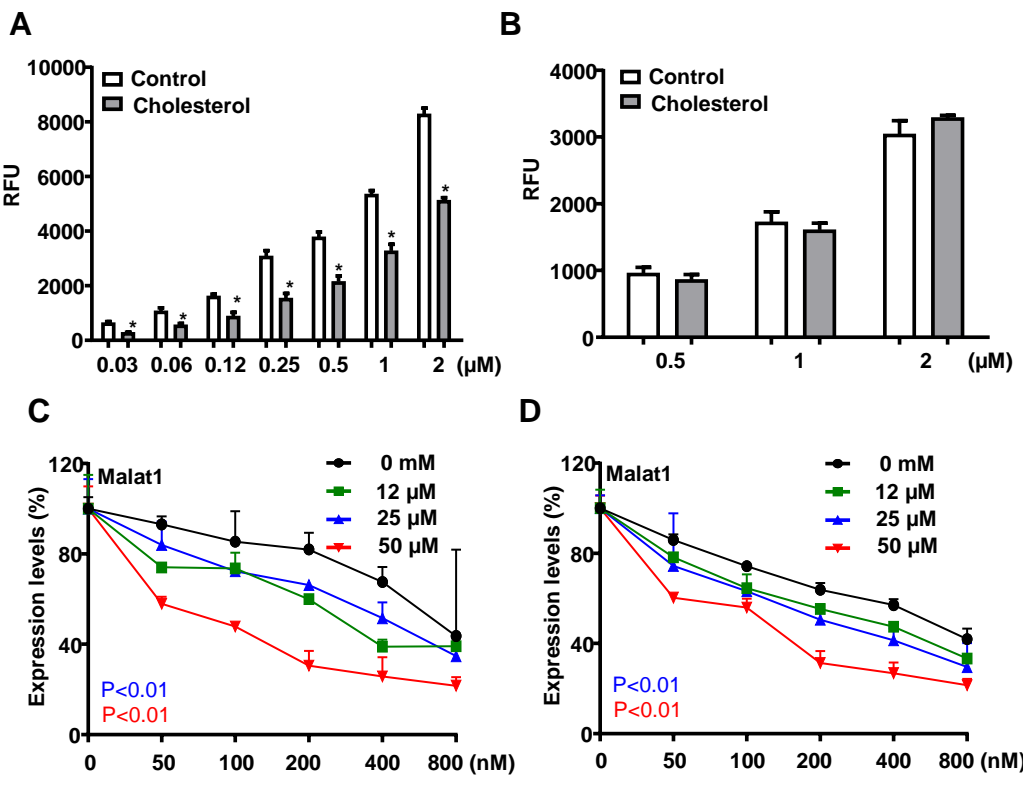

**Fig. S5.**

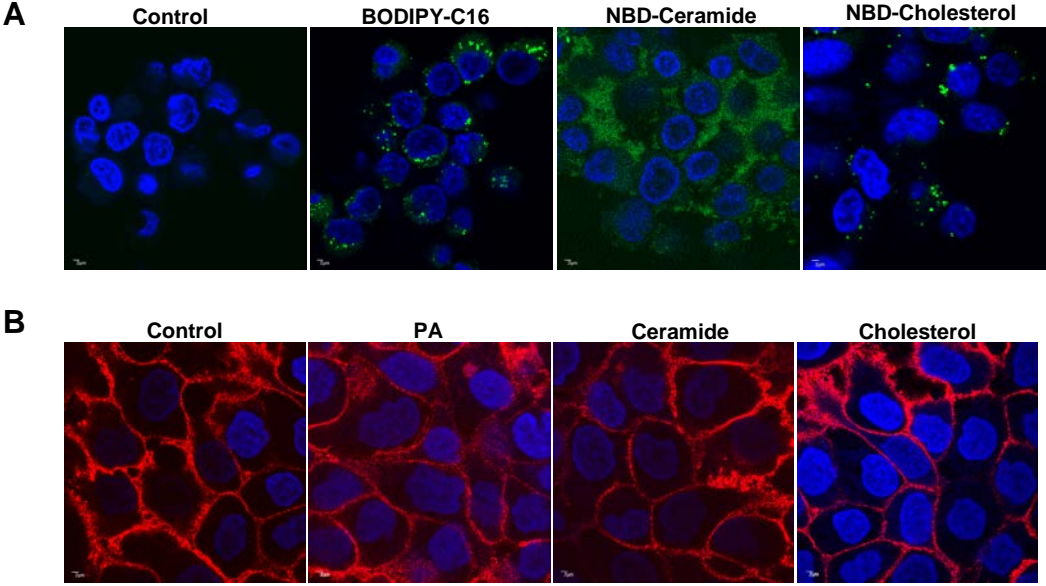

Supplement: mmc1.pdf [file mmc1.pdf]
